# Supplementary material
Source: HighWire-hosted journal article supplement (https://gut.bmj.com/content/gutjnl-2023-329807)
Supplement: inline-supplementary-material-3 [file inline-supplementary-material-3.pdf]

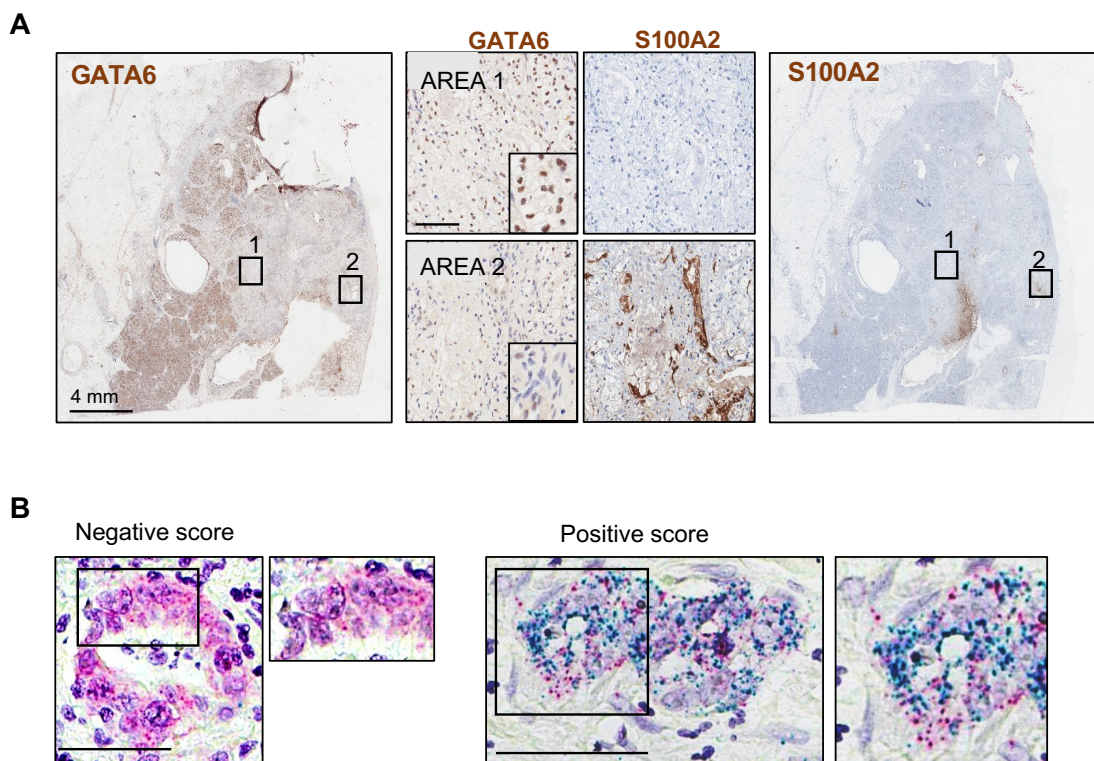

| Staining score | Microscope objective scoring                                                                  |
|----------------|-----------------------------------------------------------------------------------------------|
| 0              | No staining or less than 1 dot in every 10 cells (40X magnification)                          |
| 1              | 1-3 dots/cell (visible at 20-40X magnification)                                               |
| 2              | 4-10 dots/cell. Very few dot clusters (visible at 20-40X magnification)                       |
| 3              | > 10 dots/cell. Less than 10% positive cells have dot clusters (visible at 20X magnification) |
| 4              | > 10 dots/cell. More than 10% positive cells have dot clusters (visible at 20X magnification) |

Figure S3
