# Supplementary material
Source: HighWire-hosted journal article supplement (https://gut.bmj.com/content/gutjnl-2023-329807)
Supplement: inline-supplementary-material-4 [file inline-supplementary-material-4.pdf]

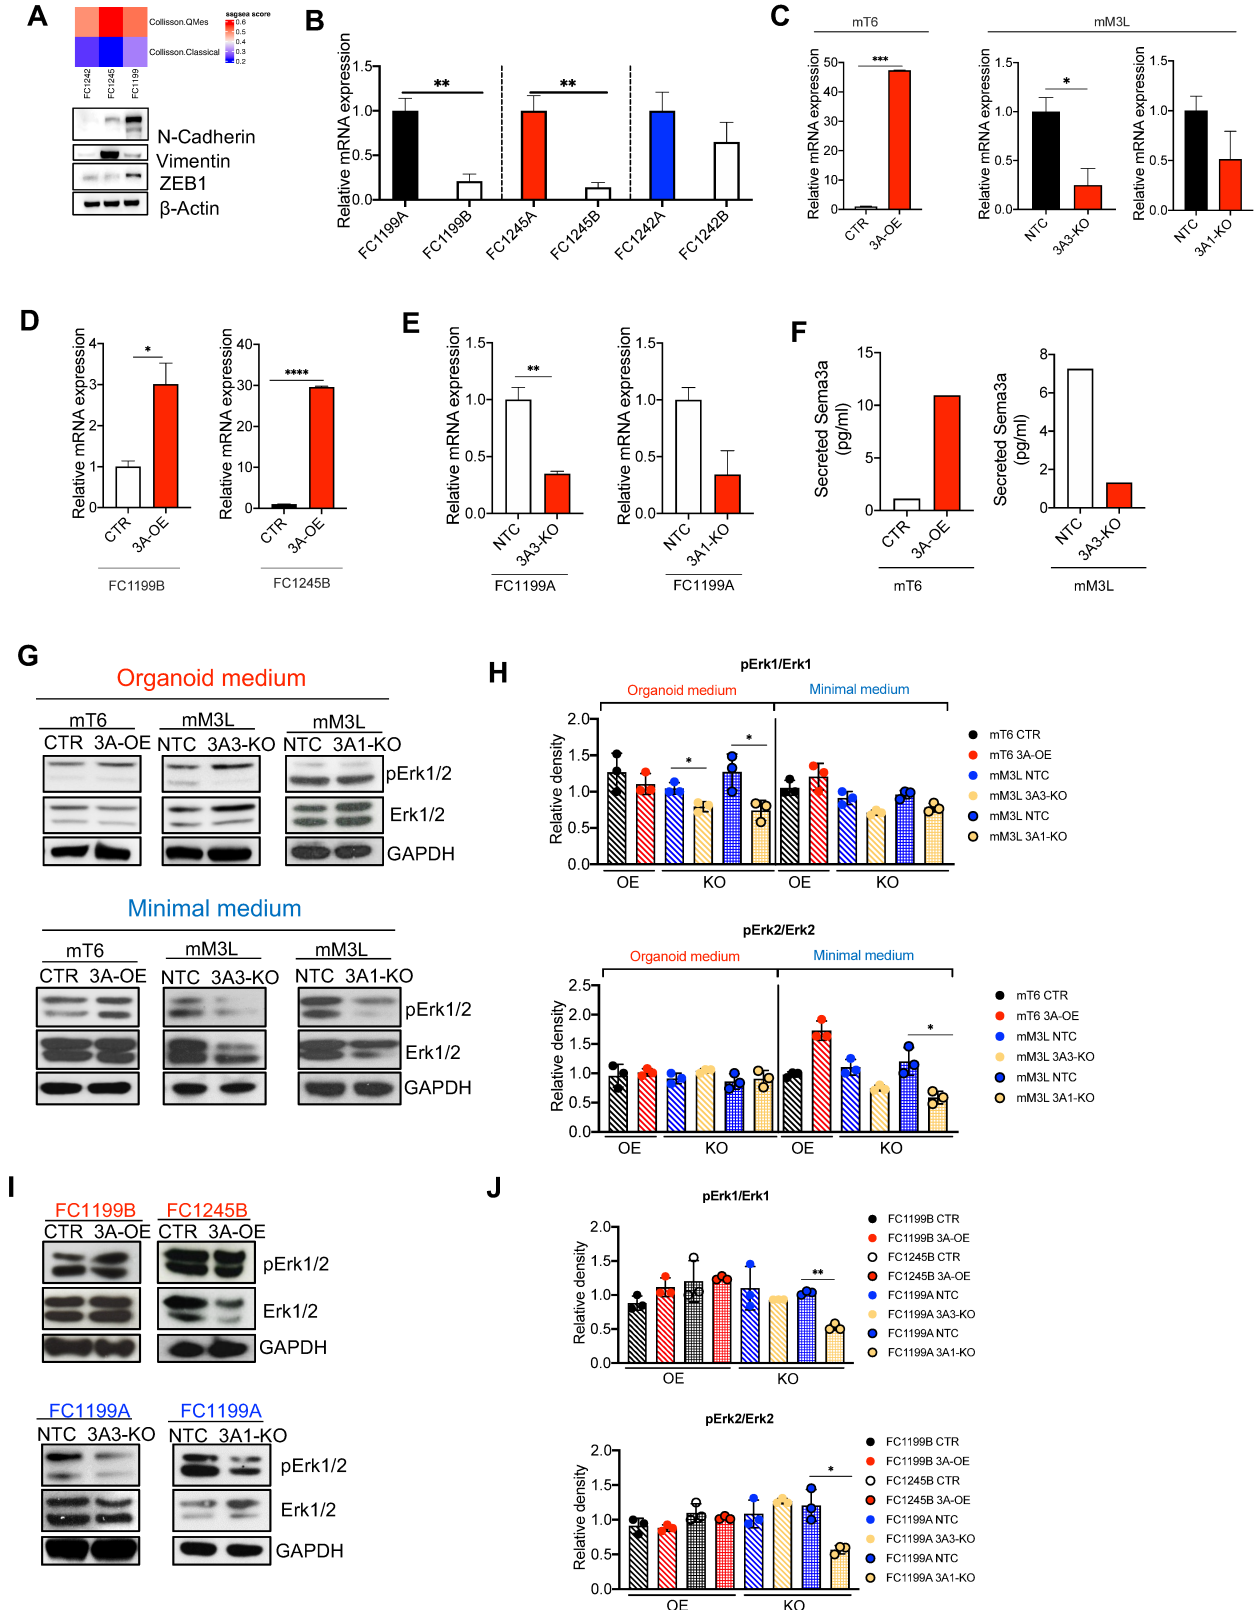

Figure S4
